# Supplementary material for: Can AI-generated news reduce hostile media perceptions? Findings from two experiments
Source: Frontiers journal article supplement (doi:10.3389/fcomm.2025.1484186), 2025-03-13
Supplement: Data_Sheet_1.pdf [file Data_Sheet_1.pdf]

## Appendix

### **Can AI-generated News Reduce Hostile Media Perceptions? Findings from Two Experiments**

|                                     |   |
|-------------------------------------|---|
| Study 1                             |   |
| Example Stimulus .....              | 2 |
| Mean Differences by Condition ..... | 3 |
| Moderation Analyses .....           | 4 |
| Conditional Process Analyses .....  | 5 |
| Study 2                             |   |
| Example Stimulus .....              | 6 |
| Mean Differences by Condition ..... | 7 |
| Moderation Analyses .....           | 8 |
| Conditional Process Analyses .....  | 9 |

## Study 1: Example Stimulus (AI author condition)

Online Version – Current Events in America – USA Today

01.17.22 09:17

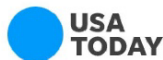

January 17th, 2022, 9:17 am

**JAmle** (USA Today's Artificial Intelligence, AI)

*The facts of this article were researched in databases independently by **JAmle**, an AI-based computer software. The article was also generated by **JAmle**.*

### The pros and cons of gun regulation in the United States

*For decades, gun policy has been debated in the United States.  
What are the key facts for and against gun regulation?*

Information on gun regulations is widely available. Based on analyses from research databases, 3 facts that support stricter gun regulations (i.e., anti-gun policies) and 3 facts that are against stricter gun regulations (i.e., pro-gun policies) have been collected. These facts help us in answering the question: Does America need stricter gun regulations or not?

#### Against stricter gun regulations

- Guns prevent deaths: Research shows 40% of felons have not committed crimes (rapes, murders) because they feared the prospective victim was armed.
- Researchers found that guns were used for self-protection between 2.1 and 2.5 million times per year.
- Fatal firearm-related accidents are at their lowest rate since 1903 and guns are involved in 0.27 percent of all accidental deaths.

#### For stricter gun regulations

- Guns lead to deaths: Research shows every day more than 100 Americans are killed with guns and more than 200 individuals are shot and wounded.
- Researchers found that the US gun homicide rate is 25 times higher than in other high-income countries
- Firearms are the leading cause of death for American children and teens.

Continue Reading

Email: [jamie\\_AI@usatoday.com](mailto:jamie_AI@usatoday.com)

### Study 1: Mean Differences by Condition

Table 1

*Mean scores and mean differences of Study 1*

| Variables  | AI-generated<br>Means (SD) | Human<br>Means (SD)     | AI-assisted<br>Means (SD) | Inferential                     |
|------------|----------------------------|-------------------------|---------------------------|---------------------------------|
| HMP        | 3.25(1.65) <sup>b</sup>    | 3.78(1.15) <sup>a</sup> | 3.86(1.21) <sup>a</sup>   | $F(405) = 8.284$ ,<br>$p = .00$ |
| Commenting | 3.08(1.92) <sup>a</sup>    | 3.37(2.03) <sup>a</sup> | 3(1.88) <sup>a</sup>      | $F(405) = 1.277$ ,<br>$p = .28$ |
| Sharing    | 3.30(1.99) <sup>a</sup>    | 3.57(2.02) <sup>a</sup> | 3.04(1.87) <sup>a</sup>   | $F(405) = 2.353$ ,<br>$p = .09$ |
| Posting    | 2.79(1.89) <sup>b</sup>    | 3.07(1.99) <sup>b</sup> | 2.40(1.62) <sup>a</sup>   | $F(405) = 4.307$ ,<br>$p = .01$ |

Note: means without a superscript letter in common are significantly different from one another at  $p < .05$ .

### Study 1: Moderation Analyses

Table 2

*PROCESS Macro for R moderation analyses in Study 1 (no control)*

| Outcome Variable                                            | Moderator           | Effect of Condition on DV (SE), [95% CI] | Effect of W on DV (SE), [95% CI] | Interaction of XW on DV (SE), [95% CI] | Conditional Effect (SE), [95% CI] |                          |                          |
|-------------------------------------------------------------|---------------------|------------------------------------------|----------------------------------|----------------------------------------|-----------------------------------|--------------------------|--------------------------|
|                                                             |                     |                                          |                                  |                                        | M-1SD (-1.086)                    | M (0.164)                | M+1SD (1.164)            |
| Comparing AI-generated Condition (1) to Human Condition (0) |                     |                                          |                                  |                                        |                                   |                          |                          |
| HMP                                                         | Attitude towards AI | b=-.53(.17), [-.86, -.21]                | b=-.08(.08), [-.24, .07]         | b=.24(.12), [.01, .48]                 | b=-.80(.21), [-1.21, -.38]        | b=.49(.17), [-.82, -.17] | b=-.25(.22), [-.68, .18] |
| Comparing AI-assisted Condition (1) to Human Condition (0)  |                     |                                          |                                  |                                        |                                   |                          |                          |
| HMP                                                         | Attitude towards AI | b=.07(.17), [-.26, .41]                  | b=.07(.07), [-.07, .21]          | b=-.17(.13), [-.43, .10]               |                                   |                          |                          |

Table 3

*PROCESS Macro moderation analyses in Study 1 controlling for trust in USAToday, political orientation, news media consumption*

| Outcome Variable                                                   | Moderator           | Effect of Condition on DV (SE), [95% CI] | Effect of W on DV (SE), [95% CI] | Interaction of XW on DV (SE), [95% CI] |
|--------------------------------------------------------------------|---------------------|------------------------------------------|----------------------------------|----------------------------------------|
| <b>Comparing AI-generated Condition (1) to Human Condition (0)</b> |                     |                                          |                                  |                                        |
| HMP                                                                | Attitude towards AI | b=-.47(.17), [-.81, -.13]                | b=-.00(.01), [-.03, .02]         | b=.01(.02), [-.03, .05]                |
| <b>Comparing AI-assisted Condition (1) to Human Condition (0)</b>  |                     |                                          |                                  |                                        |
| HMP                                                                | Attitude towards AI | b=.11(.18), [-.24, .46]                  | b=.00(.01), [-.02, .03]          | b=-.01(.02), [-.05, .04]               |

### Study 1: Conditional Process Analyses

Table 4

*Exploratory conditional process analysis (Moderator = Attitude towards AI), Study 1*

| Effect                                                      | Outcome Variable | Mediator | 1 SD below<br>Moderator<br>Mean | Moderator<br>Mean | 1 SD above<br>Moderator<br>Mean | Index of<br>Moderated<br>Mediation |
|-------------------------------------------------------------|------------------|----------|---------------------------------|-------------------|---------------------------------|------------------------------------|
| Comparing AI-generated Condition (1) to Human Condition (0) |                  |          |                                 |                   |                                 |                                    |
| Indirect                                                    | Commenting       | HMP      | b=-.05(.06)                     | b=-.03(.04)       | b=-.02(.03)                     | b=.02(.02)                         |
|                                                             |                  |          | [-.19, .06]                     | [-.13, .04]       | [-.09, .03]                     | [-.02, .07]                        |
|                                                             | Sharing          |          | b=-.02 (.06)                    | b=-.01(.04)       | b=-.01(.03)                     | b=.01(.02)                         |
|                                                             |                  |          | [-.16, .10]                     | [-.10, .07]       | [-.07, .05]                     | [-.03, .06]                        |
|                                                             | Posting          |          | b=-.09(.07)                     | b=-.06(.04)       | b=-.03(.03)                     | b=.03(.03)                         |
|                                                             |                  |          | [-.23, .03]                     | [-.14, .02]       | [-.10, .03]                     | [-.01, .09]                        |
| Comparing AI-assisted Condition (1) to Human Condition (0)  |                  |          |                                 |                   |                                 |                                    |
| Indirect                                                    | Commenting       | HMP      | b=.02(.03)                      | b=.00(.02)        | b=-.01(.02)                     | b=-.01(.02)                        |
|                                                             |                  |          | [-.03, .08]                     | [-.03, .04]       | [-.06, .03]                     | [-.05, .02]                        |
|                                                             | Sharing          |          | b=.01 (.03)                     | b=.00(.01)        | b=-.00(.02)                     | b=-.00(.02)                        |
|                                                             |                  |          | [-.05, .06]                     | [-.03, .03]       | [-.06, .03]                     | [-.04, .03]                        |
|                                                             | Posting          |          | b=.03(.03)                      | b=.01(.02)        | b=-.01(.03)                     | b=-.02(.02)                        |
|                                                             |                  |          | [-.02, .11]                     | [-.04, .05]       | [-.09, .03]                     | [-.07, .01]                        |

## Study 2: Example Stimulus (AI author condition)

Online Version – Current Events in America – USA Today

08.29.22 09:17

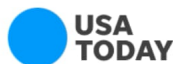

Aug. 29, 2022, 9:17 am

**JAmie** (USA Today's Artificial Intelligence, AI)

*The facts of this article were researched in databases independently by **JAmie**, an AI-based computer software. The article was also generated by **JAmie**.*

### The pros and cons of gun regulation in the United States

*For decades, gun policy has been debated in the United States. What are the key facts for and against gun regulation?*

Information on gun regulations is widely available. Based on analyses from research databases, 3 facts that support stricter gun regulations (i.e., anti-gun policies) and 3 facts that are against stricter gun regulations (i.e., pro-gun policies) have been collected. These facts help us in answering the question: Does America need stricter gun regulations or not?

#### Against stricter gun regulations

- Guns prevent deaths: Research shows 40% of felons have not committed crimes (rapes, murders) because they feared the prospective victim was armed.
- Researchers found that guns were used for self-protection between 2.1 and 2.5 million times per year.
- Fatal firearm-related accidents are at their lowest rate since 1903 and guns are involved in 0.27 percent of all accidental deaths.

#### For stricter gun regulations

- Guns lead to deaths: Research shows every day more than 100 Americans are killed with guns and more than 200 individuals are shot and wounded.
- Researchers found that the US gun homicide rate is 25 times higher than in other high-income countries
- Firearms are the leading cause of death for American children and teens.

#### Continue Reading

Email: [jamie\\_AI@usatoday.com](mailto:jamie_AI@usatoday.com)

## Study 2: Mean Differences by Condition

Table 5

*Mean scores and mean differences of Study 2*

| Variables  | AI-generated<br>Means (SD) | Human<br>Means (SD)     | AI-assisted<br>Means (SD) | Inferential                     |
|------------|----------------------------|-------------------------|---------------------------|---------------------------------|
| HMP        | 2.47(1.38) <sup>b</sup>    | 2.82(1.43) <sup>a</sup> | 2.68(1.34) <sup>b</sup>   | $F(786) = 4.426$ ,<br>$p = .01$ |
| Commenting | 3.11(1.84) <sup>a</sup>    | 2.91(1.77) <sup>a</sup> | 3.37(1.91) <sup>a</sup>   | $F(787) = 2.094$ ,<br>$p = .15$ |
| Sharing    | 3.23(1.90) <sup>a</sup>    | 3.26(1.88) <sup>a</sup> | 3.50(1.95) <sup>a</sup>   | $F(787) = 2.449$ ,<br>$p = .12$ |
| Posting    | 2.70(1.76) <sup>a</sup>    | 2.72(1.87) <sup>a</sup> | 2.80(1.89) <sup>a</sup>   | $F(787) = 0.385$ ,<br>$p = .53$ |

Note: means without a superscript letter in common are significantly different from one another at  $p < .05$ .

## Study 2: Moderation Analyses

Table 6

*PROCESS Macro for R moderation analyses in Study 2 (no control)*

| Outcome Variable                                            | Moderator           | Effect of Condition on DV (SE), [95% CI] | Effect of W on DV (SE), [95% CI] | Interaction of XW on DV (SE), [95% CI] | Conditional Effect (SE), [95% CI] |                           |                           |
|-------------------------------------------------------------|---------------------|------------------------------------------|----------------------------------|----------------------------------------|-----------------------------------|---------------------------|---------------------------|
|                                                             |                     |                                          |                                  |                                        | M-1SD (-1.086)                    | M (0.164)                 | M+1SD (1.164)             |
| Comparing AI-generated Condition (1) to Human Condition (0) |                     |                                          |                                  |                                        |                                   |                           |                           |
| HMP                                                         | Attitude towards AI | b=-.38(.12), [-.61, -.15]                | b=-.28(.05), [-.39, -.18]        | b=.32(.09), [.15, .49]                 | b=-.71(.15), [-.99, -.42]         | b=-.39(.12), [-.62, -.16] | b=.01(.16), [-.30, .32]   |
| Comparing AI-assisted Condition (1) to Human Condition (0)  |                     |                                          |                                  |                                        |                                   |                           |                           |
| HMP                                                         | Attitude towards AI | b=-.14(.13), [-.39, .11]                 | b=-.06(.05), [-.17, .04]         | b=-.26(.09), [-.43, -.10]              | b=.13(.16), [-.18, .44]           | b=-.13(.13), [-.38, .11]  | b=-.46(.16), [-.78, -.15] |

Table 7

*PROCESS Macro mediational analyses in Study 2 controlling for trust in USAToday, political orientation, news media consumption*

| Outcome Variable                                                   | Moderator           | Effect of Condition on DV (SE), [95% CI] | Effect of W on DV (SE), [95% CI] | Interaction of XW on DV (SE), [95% CI] |
|--------------------------------------------------------------------|---------------------|------------------------------------------|----------------------------------|----------------------------------------|
| <b>Comparing AI-generated Condition (1) to Human Condition (0)</b> |                     |                                          |                                  |                                        |
| HMP                                                                | Attitude towards AI | b=-.33(.13), [-.57, -.08]                | b=-.04(.01), [-.06, -.02]        | b=.02(.01), [-.01, .05]                |
| <b>Comparing AI-assisted Condition (1) to Human Condition (0)</b>  |                     |                                          |                                  |                                        |
| HMP                                                                | Attitude towards AI | b=-.15(.13), [-.40, .10]                 | b=-.03(.01), [-.04, -.01]        | b=-.02(.01), [-.04, .01]               |



## Study 2: Conditional Process Analyses

Table 8

*Exploratory conditional process analysis (Moderator = Attitude towards AI), Study 2*

| Effect                                                      | Outcome Variable | Mediator | 1 SD below<br>Moderator<br>Mean | Moderator<br>Mean | 1 SD above<br>Moderator<br>Mean | Index of<br>Moderated<br>Mediation |
|-------------------------------------------------------------|------------------|----------|---------------------------------|-------------------|---------------------------------|------------------------------------|
| Comparing AI-generated Condition (1) to Human Condition (0) |                  |          |                                 |                   |                                 |                                    |
| Indirect                                                    | Commenting       | HMP      | b=-.02(.04)                     | b=-.01(.02)       | b=.00(.01)                      | b=.01(.02)                         |
|                                                             |                  |          | [-.10, .05]                     | [-.06, .03]       | [-.02, .03]                     | [-.02, .05]                        |
|                                                             | Sharing          |          | b=.11 (.05)                     | b=.06(.03)        | b=-.00(.03)                     | b=-.05(.02)                        |
|                                                             |                  |          | [.03, .21]                      | [.01, .13]        | [-.05, .05]                     | [-.10, -.01]                       |
|                                                             | Posting          |          | b=-.00(.04)                     | b=-.00(.02)       | b=.00(.01)                      | b=.00(.02)                         |
|                                                             |                  |          | [-.08, .08]                     | [-.05, .05]       | [-.02, .02]                     | [-.04, .04]                        |
| Comparing AI-assisted Condition (1) to Human Condition (0)  |                  |          |                                 |                   |                                 |                                    |
| Indirect                                                    | Commenting       | HMP      | b=.00(.01)                      | b=-.00(.01)       | b=-.02(.03)                     | b=-.01(.02)                        |
|                                                             |                  |          | [-.02, .04]                     | [-.03, .04]       | [-.07, .04]                     | [-.04, .02]                        |
|                                                             | Sharing          |          | b=-.02 (.03)                    | b=.02(.02)        | b=.07(.03)                      | b=.04(.02)                         |
|                                                             |                  |          | [-.08, .03]                     | [-.02, .06]       | [.01, .14]                      | [.01, .09]                         |
|                                                             | Posting          |          | b=.00(.01)                      | b=.00(.01)        | b=.00(.03)                      | b=-.00(.02)                        |
|                                                             |                  |          | [-.03, .03]                     | [-.03, .02]       | [-.06, .05]                     | [-.03, .03]                        |
